# Supplementary material
Source: publisher site journal article supplement (https://www.dovepress.com/article/287322)
Supplement: Supplementary file 1 [file get_supplementary_file.php]

**Appendix 1: an example of MEDLINE search**

| **No.** | **Search Term**  **All Field Search** | **Pubmed Result** |
| --- | --- | --- |
| 1 | best-worst scal* | 12 |
| 2 | stated preferenc* | 189 |
| 3 | revealed preferenc* | 50 |
| 4 | trade-off preferenc* | 4 |
| 5 | trade-off analys* | 19 |
| 6 | choice-format* | 120 |
| 7 | multi-attribute* | 189 |
| 8 | computer questionnaire* | 25 |
| 9 | computer-questionnaire* | 25 |
| 10 | computer survey* | 48 |
| 11 | computer-survey* | 48 |
| 12 | computer-based questionnaire* | 44 |
| 13 | computer-based-questionnaire* | 44 |
| 14 | computer-based survey* | 22 |
| 15 | computer-based-survey* | 22 |
| 16 | internet questionnaire* | 61 |
| 17 | internet-questionnaire* | 61 |
| 18 | internet survey* | 364 |
| 19 | Internet-survey* | 364 |
| 20 | web questionnaire* | 27 |
| 21 | web-questionnaire* | 27 |
| 22 | web survey* | 171 |
| 23 | web-survey* | 171 |
| 24 | web-based questionnaire* | 241 |
| 25 | web-based-questionnaire* | 241 |
| 26 | web-based survey* | 927 |
| 27 | web-based-survey* | 927 |
| 28 | conjoint analys* | 251 |
| 29 | conjoint-analys* | 251 |
| 30 | discrete choice* | 355 |
| 31 | discrete-choice* | 355 |
| 32 | discrete choice analys* | 8 |
| 33 | discrete-choice-analys* | 8 |
| 34 | choice based | 26689 |
| 35 | choice-based | 205 |
| 36 | choice based conjoint* | 46 |
| 37 | choice-based-conjoint* | 0 |
| 38 | adaptive conjoint analys* | 25 |
| 39 | adaptive-conjoint-analys* | 25 |
| 40 | conjoint value analys* | 0 |
| 41 | conjoint-value-analys* | 0 |
| 42 | fractional factorial* | 421 |
| 43 | fractional-factorial* | 421 |
| 44 | 1 or 2 or 3 or 4 or 5 or 6 or 7 or 8 or 9 or 10 or 11 or 12 or 13 or 14 or 15 or 16 or 17 or 18 or 19 or 20 or 21 or 22 or 23 or 24 or 25 or 26 or 27 or 28 or 29 or 30 or 31 or 32 or 33 or 34 or 35 or 36 or 37 or 38 or 39 or 40 or 41 or 42 or 43 | 29868 |
| 45 | Osteoarthritis | 42091 |
| 46 | degenerative arthritis* | 893 |
| 47 | degenerative-arthritis* | 893 |
| 48 | degenerative joint disease* | 1722 |
| 49 | degenerative-joint-disease* | 1722 |
| 50 | 45 OR 46 OR 47 OR 48 OR 49 | 43665 |
| 51 | 44 AND 50 | 128 |
| **Relevant Studies** | | **7** |
