# Supplementary material
Source: publisher site journal article supplement (https://www.dovepress.com/article/287322)
Supplement: Supplementary file 2 [file get_supplementary_file.php]

**Appendix 2: attributes and levels for the included studies.**

|  | **Osteoarthritis characteristics** | **Treatment characteristics** | **Treatment benefits** | **Treatment complication** | **Cost** |
| --- | --- | --- | --- | --- | --- |
| *Al-Omari, (2017)*  *Al-Omari et al., (2017)*  *Al-Omari et al., (2015)* |  | **Way of taking the medication**   1. Cream/gel 2. Oral   **Frequency**   1. Once a day 2. Twice a day 3. 3-4 times a day 4. As needed   **Availability**   1. Internet purchase 2. Over the counter 3. Prescription | **How much you would expect to beneift**   1. Expect 25% 2. Expect 50% 3. Expect 75% | **Risk of heart attacks and strokes**   1. No risk 2. Low risk 3. Moderate risk 4. High risk   **Risk of kidney and liver side effects**   1. No risk 2. Low risk 3. Moderate risk 4. High risk   **Risk of stomach side effects**   1. No risk 2. Low risk 3. Moderate risk 4. High risk   **Risk of addiction**   1. No risk 2. Low risk 3. Moderate risk 4. High risk |  |
| *Byrne et al., (2006)* | **Pain:**   1. No pain 2. Mild 3. Moderate   **Walking:**   1. Able to walk and climb stairs without difficulty 2. Able to walk without difficulty for 10 blocks. A little difficulty climbing stairs 3. Able to walk for five to six blocks, then need to stop. Some difficulty climbing stairs |  |  | **Complications:**   1. 5% chance of complications from surgery such as blood clots or infections 2. 25% chance of complications 3. 40% chance of complications   **Death:**   1. 1 in 5,000 chance of death from surgery 2. 1 in 1,000 chance of death 3. 1 in 100 chance of death   **Failure:**   1. 1% chance of reoperation needed in the next 10 years 2. 10% chance of reoperation needed in the next 10 years |  |
| *Chang et al., (2005)* | **Severity of pain:**   1. None 2. Mild 3. Moderate 4. Severe 5. Extreme   **Daily activities:**   1. None 2. Mild 3. Moderate 4. Severe 5. Extreme   **Stiffness:**   1. None 2. Mild 3. Moderate 4. Severe 5. Extreme   **Level of functioning:**   1. None 2. Mild 3. Moderate 4. Severe 5. Extreme | **Medication use (if any):**   1. None 2. Mild 3. Moderate 4. Severe 5. Extreme |  | **Gastrointestinal side effects:**   1. No side effects 2. Mild side effects, treatable with over-the-counter medication 3. Mild side effects, treatable with prescription medication 4. Ulcer, treatable with prescription medication 5. Bleeding ulcer, treatable with prescription medication 6. Bleeding ulcer requiring surgery. |  |
| *Fraenkel and Fried, (2008)* |  | **Route of administration:**   1. Cream applied up knee 2. Pills 3. Injections into the knee (up to four times per year) 4. Exercise (low impact aerobic/strength training for minimum of 30 minutes 3 times per week) | **Improved strength:**   1. Improves strength and endurance 2. Does not improve strength and endurance   **Decrease in pain:**   1. 8 out of 10 people have less pain 2. 5 out of 10 people have less pain 3. 3 out of 10 people have less pain | **Risk of dyspepsia:**   1. Causes stomach upset or heartburn in 3 out of 10 people 2. Does not cause stomach upset or heartburn   **Risk of bleeding ulcer:**   1. Causes a bleeding ulcer in 1 in 100 people 2. Does not cause bleeding ulcers |  |
| *Fraenkel et al., (2014)* |  | **The way the medication is taken:**   1. A pill taken once a day 2. An injection once a week 3. An infusion once a month | **How well the medication works**   1. Preventing the progression of arthritis in 80% of people. 2. Preventing the progression of arthritis in 60% of people. 3. Preventing the progression of arthritis in 40% of people. | **The possible risks**   1. Mild side effects 2. Moderate side effects 3. Serious side effects | **Cost**   1. Easily affordable. No changes in budget needed 2. Somewhat affordable. Minor changes in budget needed 3. Hard to afford. Major changes in budget needed. |
| *Fraenkel et al., (2004A)*  *Fraenkel et al., (2004B)*  *Fraenkel et al., (2004C)* |  | **Route of administration:**   1. Natural supplement 2. One pill by mouth; every day 3. One pill by mouth; twice a day 4. One pill by mouth; 4 times a day 5. Cream applied to knee(s) 3 times a day   **Label:**   1. Prescription medication 2. Over-the-counter medication   **Onset of action:**   1. 1–2 hours 2. Within 1 week 3. Within 2 weeks 4. Within 4 weeks | **Percent of patients who benefit:**   1. 25% 2. 50% 3. 75% 4. 100% | **Annual risk of ulcer:**   1. No added risk of ulcer 2. 1% 3. 2% 4. 8%   **Common adverse effects:**   1. Nausea, diarrhea, heartburn 2. Well tolerated 3. Nausea, constipation, dizziness |  |
| *Harris et al., (2018)* |  | **Your recovery will last**   1. 10 Weeks 2. 12 Weeks   **You will need**  **future surgery to**  **remove your joint**  hardware   1. Yes 2. No | **After surgery, your joint stiffness will be**   1. Mild 2. Moderate 3. Severe   **After Surgery, your grip strength will**   1. Improve 2. Decrease |  | **Surgery will cost**  **you (out-of pocket)**   1. $2,000 2. $4,000 3. $6,000 |
| *Hauber et al., (2013)* |  |  | **Pain while moving around 1 h after taking the Medicine**   1. None 2. Mild 3. Moderate 4. Severe   **Pain while sitting, lying down, or sleeping 1 h after taking the medicine**   1. None 2. Mild 3. Moderate 4. Severe   **Stiffness 1 h after taking the medicine**   1. None 2. Mild 3. Moderate 4. Severe   **Difficulty doing your daily activities 1 h after taking the medicine**   1. None 2. Mild 3. Moderate 4. Severe | **Chance of a bleeding ulcer requiring an operation within the next year because of the medicine**   1. None 2. 10 out of 1,000 (1.0%) 3. 50 out of 1,000 (5.0%)y 4. 100 out of 1,000 (10.0%)y   **Additional chance of a heart attack or stroke within the next 5 years because of the medicine**   1. No chance 2. out of 1,000 (0.5%) 3. 15 out of 1,000 (1.5%) 4. 30 out of 1,000 (3.0%) |  |
| *Laba et al., (2013)* |  | **Dose frequency**   1. 1 2. 3 (Base)   **Mode of action**   1. Quick pain relief (Base) 2. Slow Osteoarthritis   **Treatment Schedule**   1. When needed (Base) 2. Daily   **Prescription**   1. Yes 2. No | **Pain Efficacy**   1. 1 2. 3 3. 4 4. 7 | **Side effects**   1. No side effects (Base) 2. Drowsy/constipated 3. Heartburn/reflux, stomach ulcers 4. High blood pressure, heart/kidney/liver problems | **Monthly cost**   1. $AUS 5, 2. $AUS 20, 3. $AUS 35 4. $AUS 50 |
| *Moorman et al. (2017)* |  | **How much cutting and removal of existing bone is required**   1. None 2. 1 leg bone cut 3. 2 leg bones cut with partial bone removal 4. 2 leg bones cut with extensive bone removal   **Length of hospital stay required**   1. None, outpatient procedure 2. 1 night stay typical 3. 2 night typical   **Recovery time needed before standing, bearing**  **weight without crutches**   1. Immediately after procedure 2. wk 3. wk 4. 12 wk   **Time before resuming daily activities**   1. 1-2 mo 2. 3-4 mo 3. 5-6 mo   **Postrecovery activity restrictions**   1. No restrictions, even running and jumping allowed 2. Moderate activity allowed, excluding running and jumping 3. Only low-impact activities allowed   **Chance of additional surgery**   1. None 2. 25% require surgical removal of original implant within 2 y 3. 5% require surgical removal of original implant and progression to surgery with bone 4. cuts and extensive bone removal within 2 y | **Maintains natural knee motion**   1. Yes 2. No   **Amount of pain relief**   1. Complete relief 2. 5% experience some minor pain 3. 10% experience some minor pain 4. 30% experience some minor pain | **Limits or complicates any future treatment needs on the knee**   1. Allows all future knee surgical options 2. Allows for limited future knee surgical options (with bone cuts and partial bone removal) 3. Allows for only end-stage knee surgical options (with bone cuts and extensive bone removal) |  |
| *Pinto et al., (2019)* |  | **Time per physical activity occasion**   1. Low 2. Medium 3. High | **Health benefits**   1. Low 2. Medium 3. High   **Enjoyment**   1. Low 2. Medium 3. High   **Convenience**   1. Low 2. Medium 3. High   **Physical activity effort**   1. Low 2. Medium 3. High |  | **Monthly cost**   1. $20 per month 2. $50 per month 3. $80 per month |
| *Ratcliffe et al., (2004)* | **Joint pain:**   1. Occasionally 2. 2-3 times per week 3. Most days   **Joint aches:**   1. Very slight 2. Moderate 3. Sever   **Mobility:**   1. Normal 2. Some difficulty 3. Confined to a chair |  |  | **Risk of mild/moderate side effects:**   1. 25% 2. 50% 3. 75%   **Risk of serious side effects:**   1. 0.2% 2. 0.5% 3. 2% |  |
